# Supplementary material for: Rapid Genomic Characterization of the Genus Vitis
Source: PubMed Central journal article supplement (PMC2805708; doi:10.1371/journal.pone.0008219), 2010-01-13

**470K SNP set**

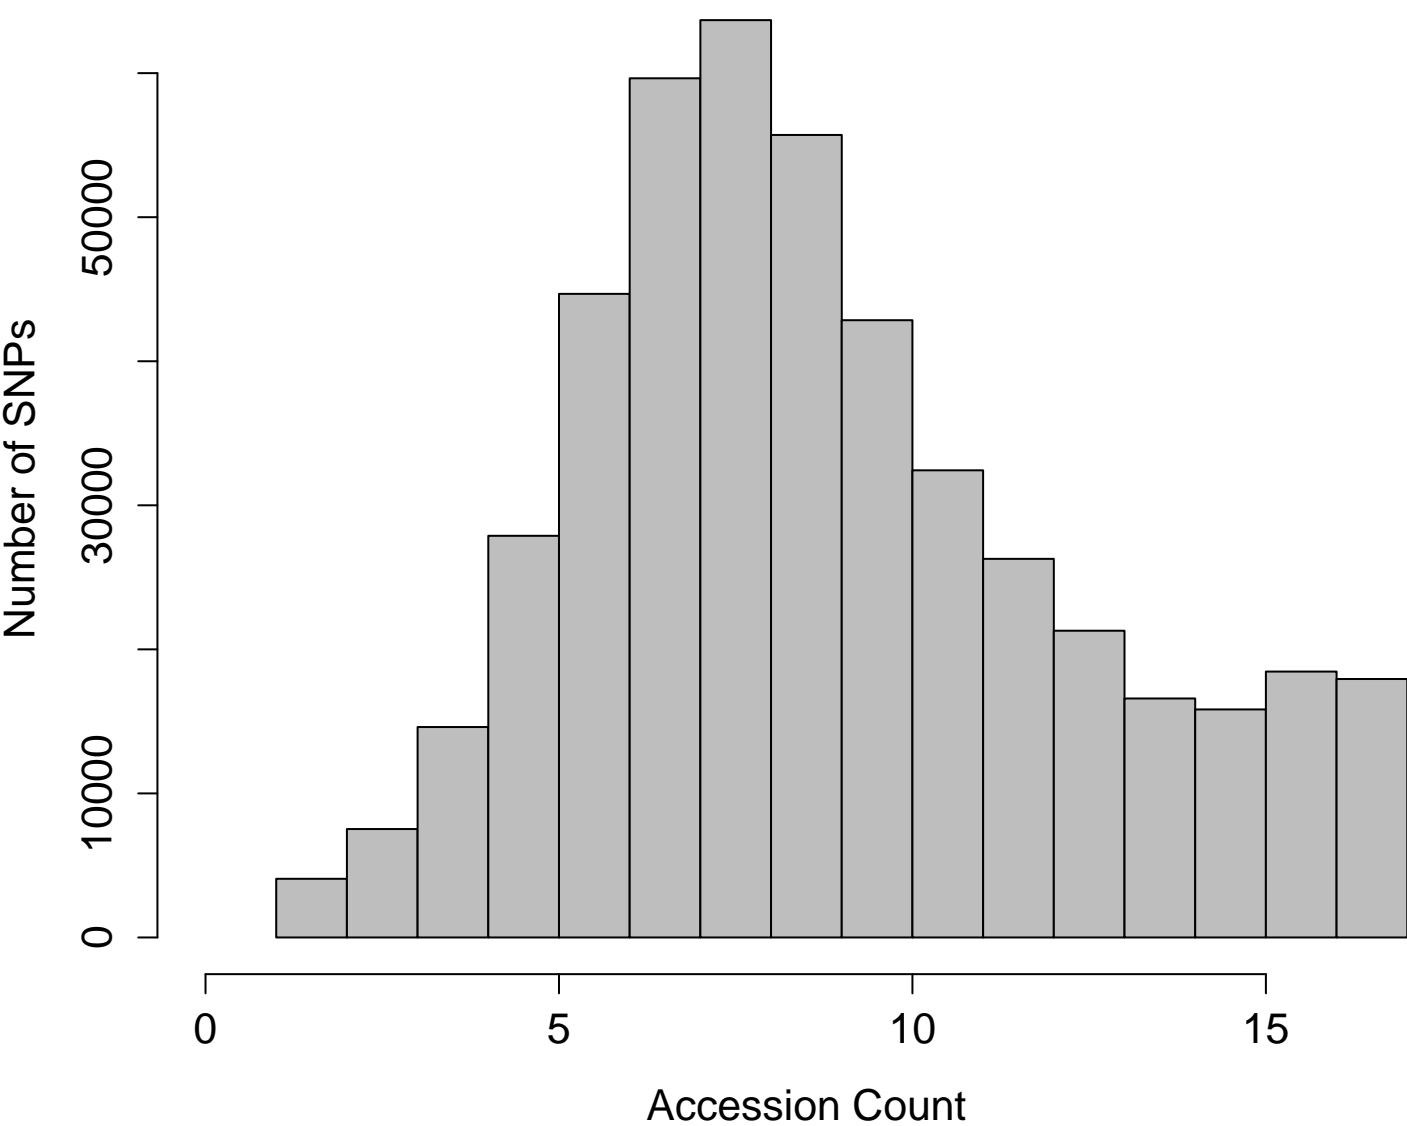

**71K SNP set**

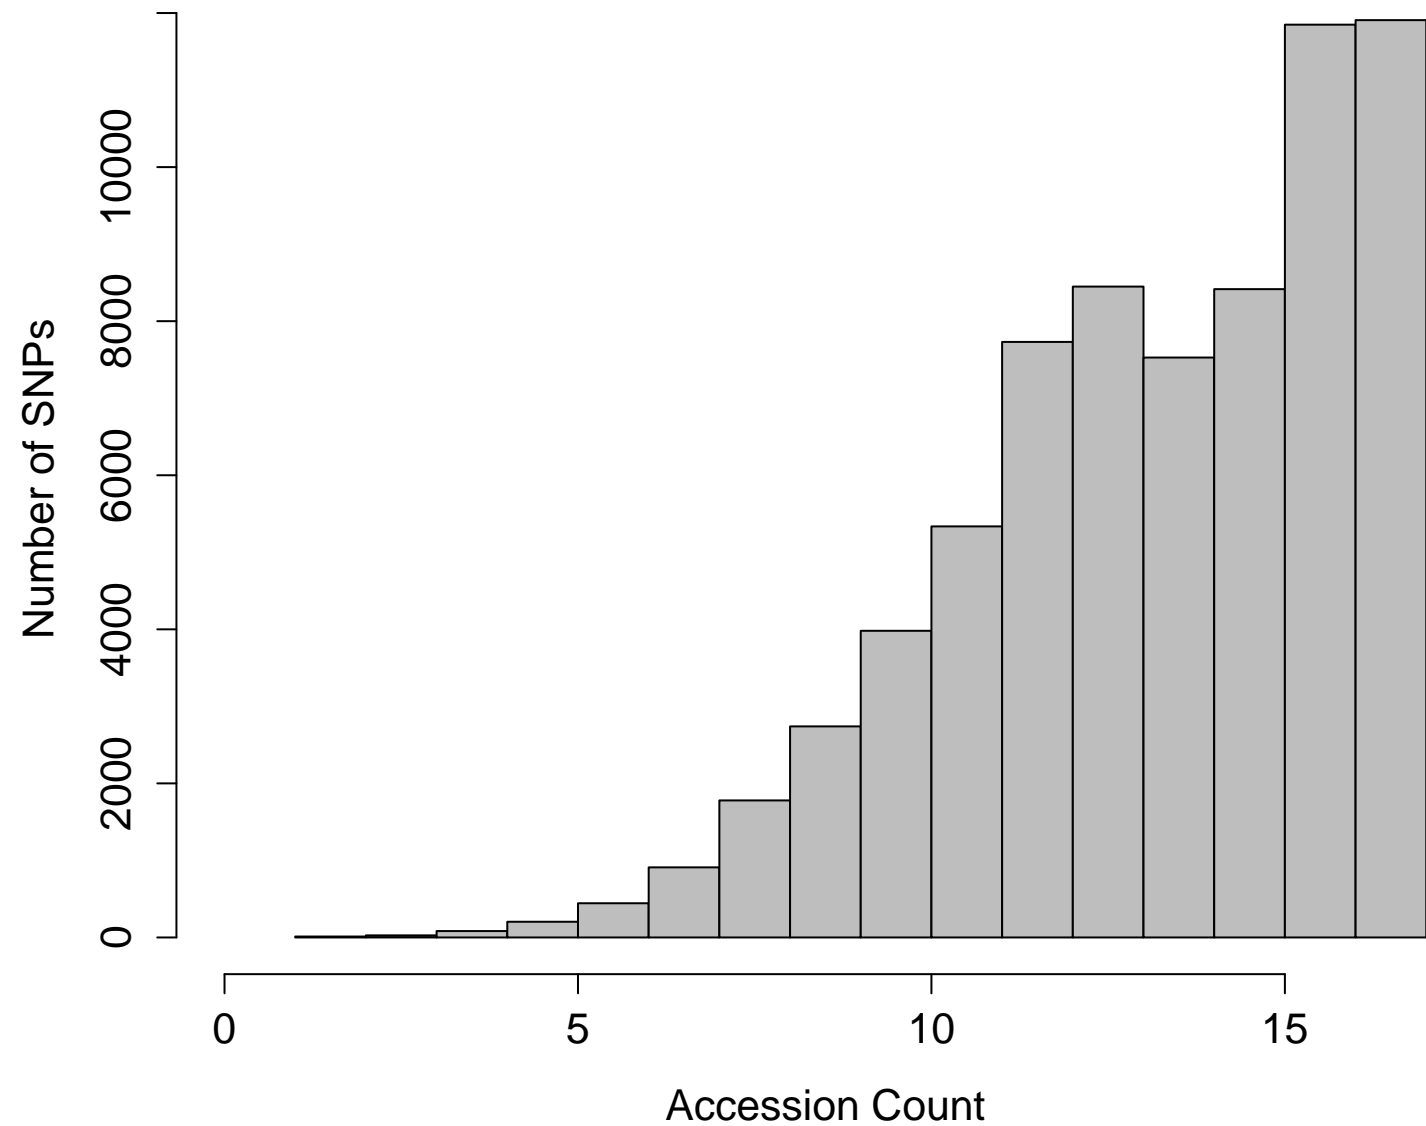

Supplement: pone.0008219.s002.pdf [file pone.0008219.s002.pdf]
