# Supplementary material for: Rapid Genomic Characterization of the Genus Vitis
Source: PubMed Central journal article supplement (PMC2805708; doi:10.1371/journal.pone.0008219), 2010-01-13

**PC1 (21.3%)**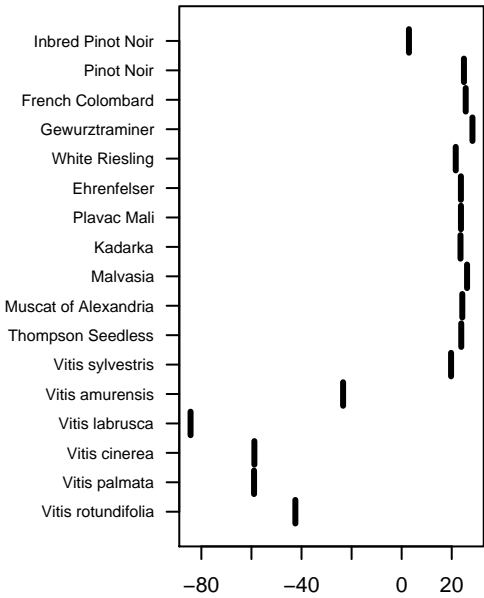**PC2 (12.5%)**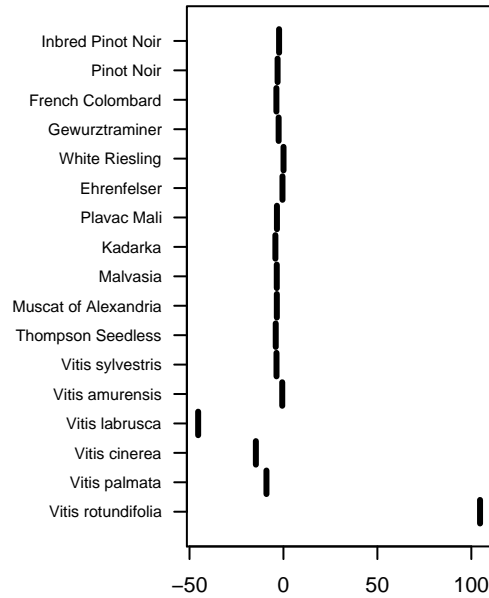**PC3 (8.8%)**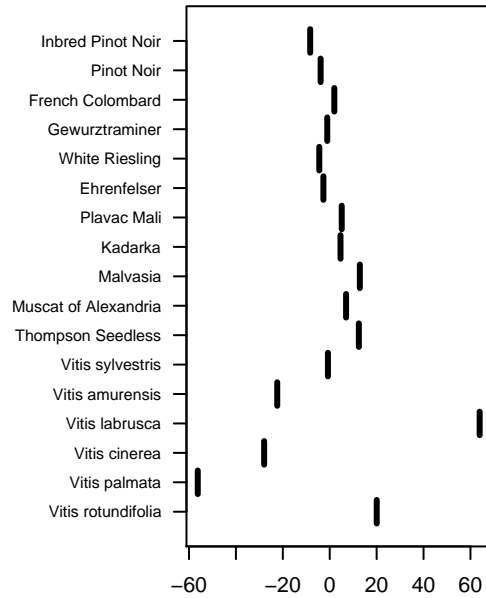**PC4 (7.4%)**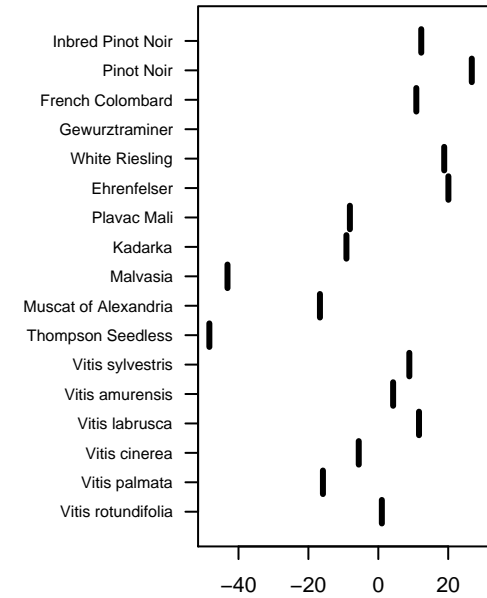**PC5 (6.6%)**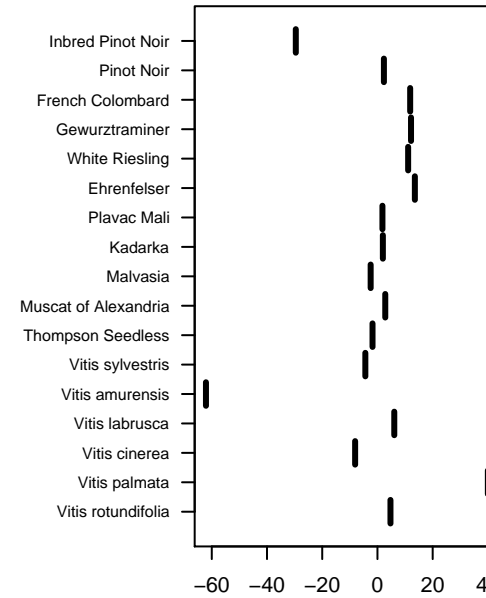**PC6 (5.9%)**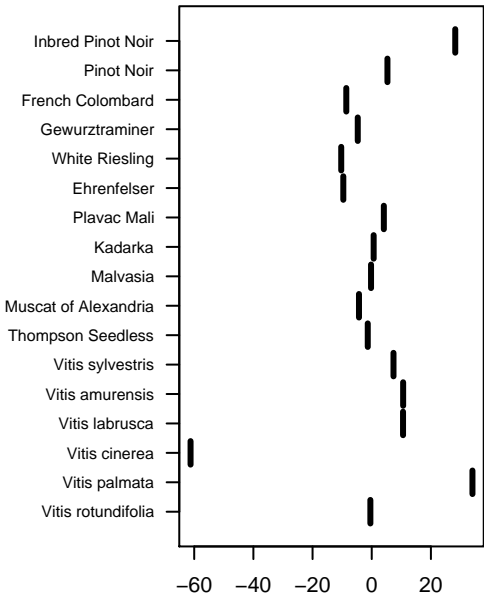**PC7 (5.3%)**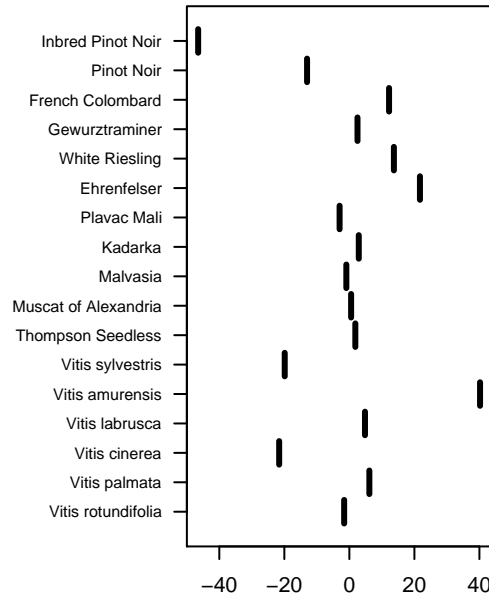**PC8 (4.8%)**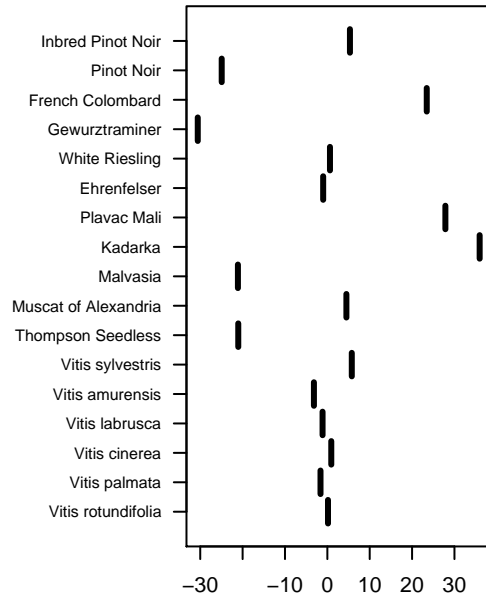**PC9 (4.5%)**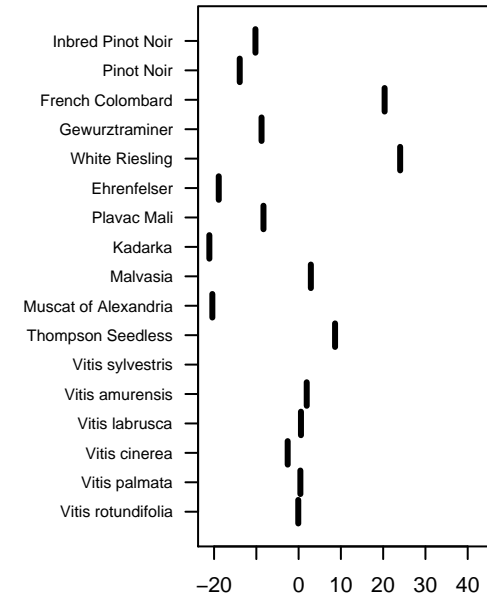**PC10 (4.1%)**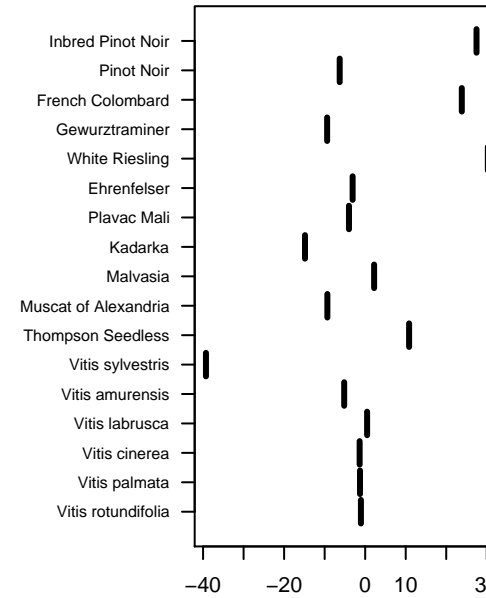

Supplement: pone.0008219.s004.pdf [file pone.0008219.s004.pdf]
