# Supplementary material for: Rapid Genomic Characterization of the Genus Vitis
Source: PLOS journal article supplement (doi:10.1371/journal.pone.0008219), 2010-01-12
Supplement: S8 (10.1371/journal.pone.0008219.s008) [file journal.pone.0008219.s008]

**Table S2:** Criteria used to choose the 8988 SNPs assayed by the Vitis9KSNP custom genotyping array. A detailed description of the selection procedures (e.g. genotypic contingency test and heterozygosity test) is provided in the Text S1. The following criteria were applied to the 470K SNP set.

| <b>Criterion</b>                                          | <b># of SNPs</b> | <b>Description</b>                                                                                                                                                                                                                                                                                                                                                                                                                                                                                |
|-----------------------------------------------------------|------------------|---------------------------------------------------------------------------------------------------------------------------------------------------------------------------------------------------------------------------------------------------------------------------------------------------------------------------------------------------------------------------------------------------------------------------------------------------------------------------------------------------|
| Segregates within <i>Vitis vinifera</i> (strict version)  | 1988             | <p>≥ 1 vinifera sample is homozygous (≥ 5 reads) for the reference allele<br/>AND<br/>           ≥ 1 vinifera sample is homozygous (≥ 5 reads) for the alternative allele<br/>AND<br/>           ≥ 1 vinifera sample passes heterozygosity test (≥ 8 reads)<br/>AND<br/>           Genotypic contingency test <math>P</math> value ≤ 0.01 within vinifera<br/>AND<br/>           Average quality score ≥ 20</p>                                                                                   |
| Segregates within wild <i>Vitis</i> species               | 208              | As above but for wild <i>Vitis</i> species                                                                                                                                                                                                                                                                                                                                                                                                                                                        |
| Segregates within <i>Vitis</i>                            | 1069             | <p>≥ 1 sample is homozygous (≥ 5 reads) for the alternative allele<br/>AND<br/>           ≥ 1 sample passes heterozygosity test (≥ 8 reads)<br/>AND<br/>           Genotypic contingency test <math>P</math> value ≤ 0.01<br/>AND<br/>           Average quality score ≥ 20</p>                                                                                                                                                                                                                   |
| Fixed within a single wild <i>Vitis</i> species           | 1192             | One wild <i>Vitis</i> sample is fixed for one allele (≥ 5 reads) and all remaining samples are fixed for the other allele                                                                                                                                                                                                                                                                                                                                                                         |
| Segregates within <i>Vitis vinifera</i> (lenient version) | 3500             | <p>[≥ 1 vinifera sample is homozygous (≥ 5 reads) for the alternative allele<br/>OR<br/>           ≥ 1 vinifera sample passes heterozygosity test (≥ 8 reads)]<br/>AND<br/>           ≥ 1 vinifera sample is homozygous (≥ 5 reads) for the reference allele<br/>AND<br/>           Proportion of vinifera samples that fail the heterozygosity test &lt; 0.2<br/>AND<br/>           Genotypic contingency test <math>P</math> value ≤ 0.01<br/>AND<br/>           Average quality score ≥ 20</p> |
| SNPs within candidate genes                               | 735              | <p>SNP falls within a gene from the pre-selected candidate gene list<br/>AND<br/>           Only one allele, reference or alternative, is present in the inbred Pinot<br/>AND<br/>           ≥ 10 samples have ≥ 1 read covering this position<br/>AND<br/>           Genotypic contingency test <math>P</math> value ≤ 0.01<br/>AND<br/>           Average quality score ≥ 20</p>                                                                                                                |
| Random SNPs                                               | 296              |                                                                                                                                                                                                                                                                                                                                                                                                                                                                                                   |
